# Supplementary material for: N-acylhydrazone inhibitors of influenza virus PA endonuclease with versatile metal binding modes
Source: PubMed Central journal article supplement (PMC4980666; doi:10.1038/srep31500), 2016-08-11
Supplement: srep31500-s1.pdf [file srep31500-s1.pdf]

## Supplementary Information

### N-acylhydrazone inhibitors of influenza virus PA endonuclease with versatile metal binding modes

Mauro Carcelli,<sup>\*‡</sup> Dominga Rogolino,<sup>‡</sup> Anna Gatti,<sup>‡</sup> Laura De Luca,<sup>±</sup> Mario Sechi,<sup>†</sup>  
Gyanendra Kumar,<sup>§</sup> Stephen W. White,<sup>§</sup> Annelies Stevaert,<sup>#</sup> and Lieve Naesens<sup>\*#</sup>

<sup>‡</sup>*Dipartimento di Chimica and Consorzio Interuniversitario di Ricerca in Chimica dei Metalli nei Sistemi Biologici, Università di Parma, Parco Area delle Scienze 17/A, 43124 Parma, Italy.*

<sup>±</sup>*Dipartimento di Scienze del Farmaco e Prodotti per la Salute, Università di Messina, Polo Universitario SS. Annunziata, 98158 Messina, Italy.* <sup>†</sup>*Dipartimento di Chimica e Farmacia, Università di Sassari, Via Vienna 2, I-07100 Sassari, Italy.* <sup>#</sup>*Rega Institute for Medical Research, KU Leuven – University of Leuven, B-3000 Leuven, Belgium.* <sup>§</sup>*Dept. of Structural Biology, St. Jude Children's Research Hospital, 262, Danny Thomas Place, Mail Stop 311, Memphis, TN 38105 U.S.A.*

**3,4,5-trihydroxybenzohydrazide (28).** Light brown powder. Yield: 70%.  $^1\text{H-NMR}$  (DMSO- $d_6$ , 25°C),  $\delta$ : 4.36 (s, br, 2H,  $\text{NH}_2$ ), 6.79 (s, 2H,  $\text{H}_{\text{arom}}$ ), 9.24 (s, br, 1H, NH); IR ( $\text{cm}^{-1}$ ):  $\nu_{\text{NH}} = 3424$ , 3390, 3296;  $\nu_{\text{C=O}} = 1600$ .

**3,4,5-trimethoxybenzohydrazide (29).** White powder. Yield: 63%.  $^1\text{H-NMR}$  (DMSO- $d_6$ , 25°C),  $\delta$ : 3.69 (s, 3H,  $\text{OCH}_3$ ), 3.81 (s, 6H,  $\text{OCH}_3$ ), 4.47 (s, br, 2H,  $\text{NH}_2$ ), 7.16 (s, 2H,  $\text{H}_{\text{arom}}$ ), 9.72 (s, br, 1H, NH); IR ( $\text{cm}^{-1}$ ):  $\nu_{\text{NH}} = 3455$ ;  $\nu_{\text{C=O}} = 1697$ ;  $\nu_{\text{C=N}} = 1596$ .

**N'-(2,3-dihydroxybenzylidene)-semicarbazide (1).** Yield = 54%.  $^1\text{H-NMR}$  (DMSO- $d_6$ , 25°C),  $\delta$ : 6.36 (s, br, 2H,  $\text{NH}_2$ ), 6.64 (t,  $J = 7.8$  Hz, 1H, ArH), 6.76 (d,  $J = 7.6$  Hz, 1H, ArH), 7.17 (d, 1H;  $J = 7.8$ , ArH), 8.14 (s, 1H;  $\text{HC=N}$ ), 9.21 (s, br, 1H; OH), 9.39 (s, br, 1H; OH), 10.18 (s, br, 1H; NH). MS (EI, 70 eV)  $m/z$  (%) = 195.2 ( $[\text{M}]^+$ , 100); IR ( $\text{cm}^{-1}$ ):  $\nu_{\text{NH}} = 3455$ ;  $\nu_{\text{OH}} = 3166$ ;  $\nu_{\text{C=O}} = 1694$ ;  $\nu_{\text{C=N}} = 1592$ . Anal. Calcd for  $\text{C}_8\text{H}_9\text{N}_3\text{O}_3$ : C 49.23; H 4.65; N 21.53. Found: C 49.64; H 4.71; N 21.71.

**N'-(2-hydroxy-3-methoxybenzylidene)-semicarbazide (2).** Yield = 81%.  $^1\text{H-NMR}$  (DMSO- $d_6$ , 25°C),  $\delta$ : 3.84 (s, 3H,  $\text{OCH}_3$ ), 6.39 (s, br, 2H,  $\text{NH}_2$ ), 6.76 (t,  $J = 7.8$  Hz, 1H, ArH), 6.92 (d,  $J = 7.6$  Hz, 1H, ArH), 7.37 (d, 1H;  $J = 7.8$ , ArH), 8.17 (s, 1H;  $\text{HC=N}$ ), 9.20 (s, br, 1H; OH), 10.20 (s, br, 1H; NH). MS (EI, 70 eV)  $m/z$  (%) = 209.2 ( $[\text{M}]^+$ , 100); IR ( $\text{cm}^{-1}$ ):  $\nu_{\text{NH}} = 3466$ ;  $\nu_{\text{OH}} = 3170$ -3280 (br);  $\nu_{\text{C=O}} = 1672$ ;  $\nu_{\text{C=N}} = 1586$ . Anal. Calcd for  $\text{C}_9\text{H}_{11}\text{N}_3\text{O}_3 \cdot 1/4\text{H}_2\text{O}$ : C 50.58; H 5.42; N 19.66. Found: C 50.67; H 5.37; N 19.44.

**N'-(2,3-dihydroxybenzylidene)heptylhydrazide (3).** Yield = 95%.  $^1\text{H-NMR}$  (DMSO- $d_6$ , 25°C),  $\delta$ : 0.83-0.86 (m,  $\text{CH}_3$ ); 1.16-1.26 (m,  $\text{CH}_2$ ); 1.54-1.59 (m,  $\text{CH}_2$ ); 2.17-2.29 (m,  $\text{CH}_2$ ); 2.53-2.59 (m, 6.64-6.73), (m, overlapping isomers, ArH), 6.81-6.84 (m, overlapping isomers, ArH), 6.92 (d, isomer E, ArH), 7.03 (d, isomer Z, ArH), 8.23 (s,  $\text{HC=N}$ , isomer E), 8.28 (s,  $\text{HC=N}$ , isomer Z), 9.21 (s, br, OH), 9.49 (s, br, OH), 11.06, 11.20, 11.59 (s, br,  $\text{NH+OH}$ ). MS (EI, 70 eV)  $m/z$  (%) = 301 ( $[\text{M+Na}]^+$ , 100); IR ( $\text{cm}^{-1}$ ):  $\nu_{\text{NH}} = 3490$ ;  $\nu_{\text{OH}} = 2922$ -2941;  $\nu_{\text{C=O}} = 1663$ . Anal. Calcd for  $\text{C}_{15}\text{H}_{22}\text{N}_2\text{O}_3 \cdot 1/2\text{H}_2\text{O}$ : C 62.70; H 8.07; N 9.75. Found: C 62.84; H 7.97; N 9.88.

**N'-(2-hydroxy-3-methoxybenzylidene)heptylhydrazide (4).** Yield = 41%.  $^1\text{H-NMR}$  (DMSO- $d_6$ , 25°C),  $\delta$  (overlapping isomers): 0.83-0.86 (m,  $\text{CH}_3$ ); 1.26-1.27 (m,  $\text{CH}_2$ ); 1.55-1.59 (m,  $\text{CH}_2$ ); 2.18-

2.23 (m, CH<sub>2</sub>); 2.52-2.57 (m, CH<sub>2</sub>), 3.79 (s, br, OCH<sub>3</sub>), 6.80-6.86 (m, ArH), 6.94-7.01 (m, ArH), 7.08 (d, isomer E, ArH), 7.20 (d, isomer Z, ArH), 8.27 (s, HC=N, isomer E), 8.34 (s, HC=N, isomer Z), 9.54 (s, br, OH), 10.96, 11.25, 11.57 (s, br, NH+OH). MS (EI, 70 eV) m/z (%) = 292.2 ([M]<sup>+</sup>, 24); IR (cm<sup>-1</sup>): ν<sub>NH</sub> = 3182; ν<sub>OH</sub> = 3072, 2917; ν<sub>C=O</sub> = 1663. Anal. Calcd for C<sub>16</sub>H<sub>24</sub>N<sub>2</sub>O<sub>3</sub>: C 65.73; H 8.27; N 9.58. Found: C 65.76; H 8.42; N 9.45.

**N<sup>1</sup>-(2,3-dihydroxybenzylidene)benzoylhydrazide (5).** Yield = 32%. <sup>1</sup>H-NMR (DMSO-d<sub>6</sub>, 25°C), δ: 6.74 (t, J = 7.8 Hz, 1H, ArH), 6.86 (d, J = 7.2 Hz, 1H, ArH), 6.97 (d, J = 7.2 Hz, 1H, ArH), 7.52-7.61 (m, 3H; ArH), 7.94 (d, 2H; J = 7.2, ArH), 8.59 (s, 1H; HC=N), 9.28 (s, br, 1H; OH), 11.16 (s, br, 1H; NH), 12.14 (s, br, 1H; OH). MS (EI, 70 eV) m/z (%) = 256.2 ([M]<sup>+</sup>, 100); IR (cm<sup>-1</sup>): ν<sub>NH</sub> = 3280; ν<sub>OH</sub> = 3047; ν<sub>C=O</sub> = 1658; ν<sub>C=N</sub> = 1527. Anal. Calcd for C<sub>14</sub>H<sub>12</sub>N<sub>2</sub>O<sub>3</sub>·1/4H<sub>2</sub>O: C 64.48; H 4.83; N 10.74. Found: C 64.64; H 4.71; N 10.71.

**N<sup>1</sup>-(2-hydroxy-3-methoxybenzylidene)benzoylhydrazide (6).** Yield = 89%. <sup>1</sup>H-NMR (DMSO-d<sub>6</sub>, 25°C), δ: 3.81 (s, 3H, OCH<sub>3</sub>), 6.87 (t, J = 7.8 Hz, 1H, ArH), 7.04 (d, J = 7.2 Hz, 1H, ArH), 7.15 (d, J = 7.2 Hz, 1H, ArH), 7.52-7.64 (m, 3H; ArH), 7.94 (d, 2H; J = 6.9, ArH), 8.65 (s, 1H; HC=N), 11.01 (s, br, 1H; NH), 12.05 (s, br, 1H; OH). MS (EI, 70 eV) m/z (%) = 270.1 ([M]<sup>+</sup>, 100); IR (cm<sup>-1</sup>): ν<sub>NH+OH</sub> = 2830-3072 (br); ν<sub>C=O</sub> = 1657; ν<sub>OCH<sub>3</sub></sub> = 1249, 1076. Anal. Calcd for C<sub>15</sub>H<sub>14</sub>N<sub>2</sub>O<sub>3</sub>·H<sub>2</sub>O: C 62.49; H 5.59; N 9.72. Found: C 62.88; H 5.59; N 9.94.

**N<sup>1</sup>-(2,3-dihydroxybenzylidene)-2-hydroxybenzoylhydrazide (7).** Yield = 30%. <sup>1</sup>H-NMR (DMSO-d<sub>6</sub>, 25°C), δ: 6.75 (t, J = 7.8 Hz, 1H, ArH), 6.87 (d, J = 7.2 Hz, 1H, ArH), 6.94-7.00 (m, 3H, ArH), 7.43 (t, J = 7.8 Hz, 1H; ArH), 7.88 (d, 2H; J = 7.2, ArH), 8.64 (s, 1H; HC=N), 9.32 (s, br, 1H; OH), 11.03 (s, br, 1H; NH), 12.05 (s, br, 2H; OH). MS (EI, 70 eV) m/z (%) = 272.1 ([M]<sup>+</sup>, 100); IR (cm<sup>-1</sup>): ν<sub>NH+OH</sub> = 2980-3256 (br); ν<sub>C=O</sub> = 1635. Anal. Calcd for C<sub>14</sub>H<sub>12</sub>N<sub>2</sub>O<sub>4</sub>: C 61.76; H 4.44; N 10.29. Found: C 61.97; H 4.43; N 10.20.

**N<sup>1</sup>-(2-hydroxy-3-methoxybenzylidene)-2-hydroxybenzoylhydrazide (8).** Yield = 89%. <sup>1</sup>H-NMR (DMSO-d<sub>6</sub>, 25°C), δ: 3.82 (s, 3H, OCH<sub>3</sub>), 6.85-7.06 (m, 4H, ArH), 7.17 (d, J = 7.5 Hz, 1H, ArH), 7.45 (t, J = 7.6 Hz, 1H; ArH), 7.89 (d, 2H; J = 7.5, ArH), 8.69 (s, 1H; HC=N), 10.87 (s, br, 1H;

NH), 11.99 (s, br, 2H; OH). MS (EI, 70 eV)  $m/z$  (%) = 286.0 ( $[M]^+$ , 100); IR ( $\text{cm}^{-1}$ ):  $\nu_{\text{NH+OH}}$  = 2993-3211 (br);  $\nu_{\text{C=O}}$  = 1606;  $\nu_{\text{C=N}}$  = 1560;  $\nu_{\text{OCH}_3}$  = 1256, 1079. Anal. Calcd for  $\text{C}_{15}\text{H}_{14}\text{N}_2\text{O}_4 \cdot 1/2\text{H}_2\text{O}$ : C 61.01; H 5.12; N 9.49. Found: C 61.20; H 4.89; N 9.58.

**N'-(2,4,5-trihydroxyphenyl)-2-hydroxybenzoylhydrazide (9)** Yield = 84%.  $^1\text{H-NMR}$  ( $\text{DMSO-d}_6$ ,  $25^\circ\text{C}$ ),  $\delta$ : 6.35 (s, 1H, ArH), 6.93-6.98 (m, 3H, ArH), 7.44 (t,  $J$  = 6.9, 1H, ArH), 7.89 (d,  $J$  = 7.0, 1H, ArH), 8.50 (s, 1H; HC=N), 8.62 (s, br, 1H; OH), 9.61 (s, br, 1H; OH), 10.50 (s, br, 1H, NH), 11.81, 12.00 (s, br, 1H; OH). MS (EI, 70 eV),  $m/z$  (%) = 288.1 ( $[M]^+$ , 20); IR ( $\text{cm}^{-1}$ ):  $\nu_{\text{NH+OH}}$  = 3274-3420 (br);  $\nu_{\text{C=O}}$  = 1634. Anal. Calcd for  $\text{C}_{14}\text{H}_{12}\text{N}_2\text{O}_5 \cdot \text{H}_2\text{O}$ : C 54.90; H 4.61; N 9.15. Found: C 54.65; H 4.72; N 9.29.

**N'-(2,4,6-trihydroxyphenyl)-2-hydroxybenzoylhydrazide (10)** Yield = 65%.  $^1\text{H-NMR}$  ( $\text{DMSO-d}_6$ ,  $25^\circ\text{C}$ ),  $\delta$ : 5.86 (s, 2H, ArH), 6.93-6.98 (m, 2H, ArH), 7.45 (t,  $J$  = 6.9, 1H, ArH), 7.88 (d,  $J$  = 7.0, 1H, ArH), 8.83 (s, 1H; HC=N), 9.89 (s, br, 1H; OH), 11.09 (s, br, 1H; NH), 11.95, 11.97 (s, br, 1H; OH). MS (EI, 70 eV),  $m/z$  (%) = 288.1 ( $[M]^+$ , 20); IR ( $\text{cm}^{-1}$ ):  $\nu_{\text{NH+OH}}$  = 3100-3360 (br);  $\nu_{\text{C=O}}$  = 1631. Anal. Calcd for  $\text{C}_{14}\text{H}_{12}\text{N}_2\text{O}_5 \cdot \text{H}_2\text{O}$ : C 54.90; H 4.61; N 9.15. Found: C 54.82; H 4.52; N 9.42.

**N'-(3,4,5-trihydroxyphenyl)-2-hydroxybenzoylhydrazide (11)** Yield = 76 %.  $^1\text{H-NMR}$  ( $\text{DMSO-d}_6$ ,  $25^\circ\text{C}$ ),  $\delta$ : 6.72 (s, 2H, ArH), 6.92-6.97 (m, 2H, ArH), 7.43 (t,  $J$  = 7.1, 1H, ArH), 7.88 (d,  $J$  = 7.0, 1H, ArH), 8.19 (s, 1H; HC=N), 8.67 (s, br, 1H; OH), 9.18 (s, br, 2H; OH), 11.67 (s, br, 2H; NH), 12.03 (s, br, 1H; OH). MS (EI, 70 eV),  $m/z$  (%) = 287.9 ( $[M]^+$ , 35); IR ( $\text{cm}^{-1}$ ):  $\nu_{\text{NH+OH}}$  = 3280-3321 (br);  $\nu_{\text{C=O}}$  = 1637. Anal. Calcd for  $\text{C}_{14}\text{H}_{12}\text{N}_2\text{O}_5$ : C 58.33; H 4.20; N 9.72. Found: C 58.19; H 4.03; N 9.54.

**N'-(2,5-dihydroxybenzylidene)-3,4,5-trimethoxybenzoylhydrazone (12).** Yield = 90%.  $^1\text{H-NMR}$  ( $\text{DMSO-d}_6$ ,  $25^\circ\text{C}$ ),  $\delta$ : 3.74 (s, 3H, OCH<sub>3</sub>), 3.87 (s, 6H, OCH<sub>3</sub>), 6.74 (m, 2H, ArH), 7.00 (s, 1H, ArH), 7.27 (s, 2H, ArH), 8.59 (s, 1H; HC=N), 8.98 (br, 1H; OH), 10.34 (s, br, 1H; NH), 11.83 (s, br, 1H; OH). MS (EI, 70 eV),  $m/z$  (%) = 346.3 ( $[M]^+$ , 100); IR ( $\text{cm}^{-1}$ ):  $\nu_{\text{NH}}$  = 3274,  $\nu_{\text{OH}}$  = 3090-3160 (br);  $\nu_{\text{C=O}}$  = 1654. Anal. Calcd for  $\text{C}_{17}\text{H}_{18}\text{N}_2\text{O}_6$ : C 58.96; H 5.24; N 8.09. Found: C 58.82; H 5.52; N 8.15.

**N'-phenyl-3,4,5-trihydroxybenzoylhydrazide (13)** Yield = 70%. <sup>1</sup>H-NMR (DMSO-d<sub>6</sub>, 25°C), δ: 6.93 (s, 2H; ArH), 7.44 (m, 3H, ArH), 7.68 (d, J = 7.9 Hz, 2H, ArH), 8.41 (s, 1H; HC=N), 8.84 (s, br, 1H; OH), 9.15 (s, br, 2H; OH), 11.54 (s, br, 1H; NH). MS (EI, 70 eV), m/z (%) = 272.1 ([M]<sup>+</sup>, 20); IR (cm<sup>-1</sup>): ν<sub>OH</sub> = 3534, ν<sub>NH+OH</sub> = 3226-3327, (br); ν<sub>C=O</sub> = 1590. Anal. Calcd for C<sub>14</sub>H<sub>12</sub>N<sub>2</sub>O<sub>4</sub>: C 61.76; H 4.44; N 10.29. Found: C 61.55; H 4.67; N 10.04.

**N'-(2-hydroxy-benzylidene)-3,4,5-trihydroxybenzoylhydrazone (14)**. Yield = 79%. <sup>1</sup>H-NMR (DMSO-d<sub>6</sub>, 25°C), δ: 6.90-6.95 (m, 4H; ArH), 7.29 (t, 1H, J = 7.9 Hz, ArH), 7.47 (d, J = 7.8 Hz, 2H, ArH), 8.58 (s, 1H; HC=N), 8.89 (s, 1H; OH), 9.20 (s, br, 2H; OH), 11.49 (s, 1H; OH), 11.84 (s, br, 1H; NH). MS (EI, 70 eV), m/z (%) = 288.1 ([M]<sup>+</sup>, 25); IR (cm<sup>-1</sup>): ν<sub>OH</sub> = 3534, ν<sub>NH+OH</sub> = 3226-3327, (br); ν<sub>C=O</sub> = 1590. Anal. Calcd for C<sub>14</sub>H<sub>12</sub>N<sub>2</sub>O<sub>5</sub>: C 58.33; H 4.20; N 9.72. Found: C 58.67; H 4.25; N 9.80.

**N'-(2,5-dihydroxybenzylidene)-3,4,5-trihydroxybenzoylhydrazide (15)**. Yield = 59%. <sup>1</sup>H-NMR (DMSO-d<sub>6</sub>, 25°C), δ: 6.74 (m, 2H; ArH), 6.89 (s, 1H, ArH), 6.94 (s, 2H, ArH), 8.50 (s, 1H; HC=N), 8.89, 9.00 (br, 2H; OH), 9.22 (s, br, 1H; OH), 10.60 (s, br, 1H; NH), 11.74 (s, br, 1H; OH). MS (EI, 70 eV), m/z (%) = 304.1 ([M]<sup>+</sup>, 100); IR (cm<sup>-1</sup>): ν<sub>OH</sub> = 3403 (br); ν<sub>NH+OH</sub> = 3215 (br); ν<sub>C=O</sub> = 1592. Anal. Calcd for C<sub>14</sub>H<sub>12</sub>N<sub>2</sub>O<sub>6</sub>·H<sub>2</sub>O: C 52.18; H 4.38; N 8.69. Found: C 52.44; H 4.44; N 8.58.

**N'-(2-hydroxy-5-methoxybenzylidene)-3,4,5-trihydroxybenzoylhydrazide (16)** Yield = 92%. <sup>1</sup>H-NMR (DMSO-d<sub>6</sub>, 25°C), δ: 3.73 (s, 3H, OCH<sub>3</sub>), 6.84-6.91 (m, 2H, ArH), 6.94 (s, 1H, ArH), 7.06 (s, 1H, ArH), 8.56 (s, 1H; HC=N), 8.97 (br, 3H; OH), 10.89 (s, br, 1H; NH), 11.83 (s, br, 1H; OH). MS (EI, 70 eV), m/z (%) = 318.3 ([M]<sup>+</sup>, 100); IR (cm<sup>-1</sup>): ν<sub>OH</sub> = 3496, ν<sub>NH+OH</sub> = 3178 (br); ν<sub>C=O</sub> = 1654. Anal. Calcd for C<sub>15</sub>H<sub>14</sub>N<sub>2</sub>O<sub>6</sub>: C 56.60; H 4.43; N 8.80. Found: C 56.89; H 4.32; N 8.96.

**N'-(2,4-dihydroxybenzylidene)-3,4,5-trihydroxybenzoylhydrazide (17)**. Yield = 43%. <sup>1</sup>H-NMR (DMSO-d<sub>6</sub>, 25°C), δ: 6.31 (s, 1H; ArH), 6.36 (dd, J = 7.9 Hz, 1H, ArH), 6.92 (s, 2H, ArH), 7.24 (d, J = 7.8 Hz, 1H, ArH), 8.45 (s, 1H; HC=N), 9.18 (s, br, 2H; OH), 9.93 (s, br, 1H; OH), 11.63 (m, br, 2H; NH+OH). MS (EI, 70 eV), m/z (%) = 304.1 ([M]<sup>+</sup>, 100); IR (cm<sup>-1</sup>): ν<sub>OH</sub> = 3552; ν<sub>NH+OH</sub> = 3261-

3320 (br);  $\nu_{C=O}$  = 1630;  $\nu_{C=N}$  = 1565. Anal. Calcd for  $C_{14}H_{12}N_2O_6$ : C 55.27; H 3.98; N 9.21. Found: C 55.02; H 3.88; N 9.20.

**N'-(2,3-dihydroxybenzylidene)-3,4,5-trihydroxybenzoylhydrazide (18).** Yield = 83%.  $^1H$ -NMR (DMSO- $d_6$ , 25°C),  $\delta$ : 6.73 (t, J = 7.8 Hz, 1H, ArH), 6.84 (d, J = 7.2 Hz, 1H, ArH), 6.90 (d, 1H, ArH), 6.95 (s, 2H; ArH), 8.53 (s, 1H; HC=N), 8.89 (s, br, 1H; OH), 9.12 (s, br, 1H; OH), 9.21 (s, br, 2H; OH), 11.41 (s, br, 1H; NH), 11.83 (s, br, 1H; OH). MS (EI, 70 eV) m/z (%) = 304.0 ( $[M]^+$ , 100);  $\nu_{NH+OH}$  = 3255 (br);  $\nu_{C=O}$  = 1654. Anal. Calcd for  $C_{14}H_{12}N_2O_6$ : C 55.27; H 3.98; N 9.21. Found: C 55.04; H 4.12; N 9.15.

**N'-(2-hydroxy-3-methoxybenzylidene)-3,4,5-trihydroxybenzoylhydrazide (19, H<sub>2</sub>L).** Yield = 61%.  $^1H$ -NMR (DMSO- $d_6$ , 25°C),  $\delta$ : 3.81 (s, 3H, OCH<sub>3</sub>), 6.85 (t, J = 7.9 Hz, 1H, ArH), 6.94 (s, 2H; ArH), 7.03 (d, J = 8.1 Hz, 1H, ArH), 7.08 (d, 1H, J = 7.9 Hz, ArH), 8.58 (s, 1H; HC=N), 8.90 (s, br, 1H; OH), 9.19 (s, br, 2H; OH), 11.25 (s, br, 1H; NH), 11.80 (s, br, 2H; OH).  $^1H$ -NMR (MeOD- $d_4$ , 25°C),  $\delta$ : 3.91 (s, 3H, OCH<sub>3</sub>), 6.91 (t, J = 7.9 Hz, 1H, ArH), 7.03-7.07 (m, 3H; ArH), 7.23 (d, J = 7.6 Hz, 1H, ArH), 8.57 (s, 1H; HC=N).  $^{13}C$ -NMR (MeOD- $d_4$ , 25°C),  $\delta$ : 55.43; 107.11; 113.72; 118.87; 119.10; 121.39; 122.90; 137.54; 145.61; 147.48; 148.17; 148.54; 164.75. MS (EI, 70 eV) m/z (%) = 318.0 ( $[M]^+$ , 100); IR ( $cm^{-1}$ ):  $\nu_{OH}$  = 3418;  $\nu_{NH+OH}$  = 3222 (br);  $\nu_{C=O}$  = 1664;  $\nu_{C=N}$  = 1598;  $\nu_{OCH_3}$  = 1252, 1033. Anal. Calcd for  $C_{15}H_{14}N_2O_6 \cdot H_2O$ : C 53.57; H 4.80; N 8.33. Found: C 53.50; H 4.88; N 7.92.

**N'-(2,3,4-trihydroxyphenyl)-3,4,5-trihydroxybenzoylhydrazide (20).** Yield = 25%.  $^1H$ -NMR (DMSO- $d_6$ , 25°C),  $\delta$ : 6.38 (d, J = 9 Hz, 1H, ArH), 6.72 (d, J = 8.9 Hz, 1H, ArH), 6.92 (s, 2H, ArH), 8.41 (s, 1H; HC=N), 8.44 (s, br, 1H; OH), 8.86 (s, br, 1H; OH), 9.19 (s, br, 2H; OH), 9.40 (s, br, 1H; OH), 11.66 (s, br, 1H; NH), 11.72 (s, br, 1H; OH). MS (EI, 70 eV), m/z (%) = 319.9 ( $[M]^+$ , 40); IR ( $cm^{-1}$ ):  $\nu_{NH+OH}$  = 3298-3420 (br);  $\nu_{C=O}$  = 1608. Anal. Calcd for  $C_{14}H_{12}N_2O_7$ : C 52.51; H 3.78; N 8.75. Found: C 52.42; H 3.88; N 8.56.

**N'-(2,4,5-trihydroxyphenyl)-3,4,5-trihydroxybenzoylhydrazide (21).** Yield = 83%.  $^1H$ -NMR (DMSO- $d_6$ , 25°C),  $\delta$ : 6.32 (s, 1H, ArH), 6.79 (s, 1H, ArH), 6.91 (s, 2H, ArH), 8.38 (s, 1H; HC=N),

8.53 (s, br, 1H; OH), 8.83 (s, br, 1H; OH), 9.16(s, br, 2H; OH), 9.52 (s, br, 1H; OH), 10.83 (s, br, 1H, NH), 11.52 (s, br, 1H; OH). MS (EI, 70 eV),  $m/z$  (%) = 320.1 ( $[M]^+$ , 20); IR ( $\text{cm}^{-1}$ ):  $\nu_{\text{NH+OH}}$  = 3250-3300 (br);  $\nu_{\text{C=O}}$  = 1635. Anal. Calcd for  $\text{C}_{14}\text{H}_{12}\text{N}_2\text{O}_7$ : C 52.51; H 3.78; N 8.75. Found: C 52.35; H 4.02; N 8.67.

**N'-(2,4,6-trihydroxyphenyl)-3,4,5-trihydroxybenzoylhydrazide (22).** Yield = 72%.  $^1\text{H-NMR}$  ( $\text{DMSO-d}_6$ ,  $25^\circ\text{C}$ ),  $\delta$ : 5.83 (s, 2H, ArH), 6.90 (s, 2H, ArH), 8.75 (s, 1H; HC=N), 8.85 (s, br, 1H; OH), 9.18 (s, br, 2H; OH), 9.77 (s, br, 1H; OH), 11.12 (s, br, 2H; NH+OH), 11.60 (s, br, 1H; OH). MS (EI, 70 eV),  $m/z$  (%) = 320.2 ( $[M]^+$ , 35); IR ( $\text{cm}^{-1}$ ):  $\nu_{\text{NH+OH}}$  = 3298-3420 (br);  $\nu_{\text{C=O}}$  = 1608. Anal. Calcd for  $\text{C}_{14}\text{H}_{12}\text{N}_2\text{O}_7$ : C 52.51; H 3.78; N 8.75. Found: C 52.74; H 3.51; N 8.53.

**N'-(3,4,5-trihydroxyphenyl)-3,4,5-trihydroxybenzoylhydrazide (23).** Yield = 73%.  $^1\text{H-NMR}$  ( $\text{DMSO-d}_6$ ,  $25^\circ\text{C}$ ),  $\delta$ : 6.65 (s, 2H, ArH), 6.89 (s, 2H, ArH), 8.12 (s, 1H; HC=N), 8.55 (s, br, 1H; OH), 8.80 (s, br, 1H; OH), 9.11-9.14 (m, br, 4H; NH+OH), 11.26 (s, br, 1H; OH). MS (EI, 70 eV),  $m/z$  (%) = 320.2 ( $[M]^+$ , 35); IR ( $\text{cm}^{-1}$ ):  $\nu_{\text{NH+OH}}$  = 3244-3343 (br);  $\nu_{\text{C=O}}$  = 1620. Anal. Calcd for  $\text{C}_{14}\text{H}_{12}\text{N}_2\text{O}_7$ : C 52.51; H 3.78; N 8.75. Found: C 52.55; H 3.92; N 8.73.

**N'-(2-pyridyl)-3,4,5-trihydroxybenzoylhydrazide (24).** Yield = 55%.  $^1\text{H-NMR}$  ( $\text{DMSO-d}_6$ ,  $25^\circ\text{C}$ ),  $\delta$ : 6.97 (s, 2H; ArH), 7.67 (m, 1H, ArH), 8.12-8.22 (m, 2H, ArH), 8.58 (s, 1H; HC=N), 8.71 (d, 1H; ArH). MS (EI, 70 eV),  $m/z$  (%) = 273.1 ( $[M]^+$ , 20); IR ( $\text{cm}^{-1}$ ):  $\nu_{\text{OH}}$  = 3531,  $\nu_{\text{NH+OH}}$  = 3216-3297, (br);  $\nu_{\text{C=O}}$  = 1598. Anal. Calcd for  $\text{C}_{13}\text{H}_{11}\text{N}_3\text{O}_4$ : C 57.14; H 4.06; N 15.38. Found: C 57.35; H 4.10; N 15.43

**N'-(2-pyrrolidyl)-3,4,5-trihydroxybenzoylhydrazide (25).** Yield = 25%.  $^1\text{H-NMR}$  ( $\text{DMSO-d}_6$ ,  $25^\circ\text{C}$ ),  $\delta$ : 6.12 (s, 1H; ArH), 6.43 (s, 1H, ArH), 6.89 (s, 3H, ArH), 8.24 (s, 1H; HC=N), 8.75, 9.10 (s, br, 3H; OH), 11.20 (s, br, 1H; NH), 11.44 (s, br, 1H; OH). MS (EI, 70 eV),  $m/z$  (%) = 261.0 ( $[M]^+$ , 15); IR ( $\text{cm}^{-1}$ ):  $\nu_{\text{NH+OH}}$  = 3215 (br);  $\nu_{\text{C=O}}$  = 1600. Anal. Calcd for  $\text{C}_{12}\text{H}_{11}\text{N}_3\text{O}_4$ : C 55.17; H 4.24; N 16.09. Found: C 55.22; H 4.43; N 15.79.

**N'-(3-(1,1'-biphenyl)-4-carboxylic acid)-3,4,5-trihydroxybenzoylhydrazide (26).** Yield = 51%.  $^1\text{H-NMR}$  ( $\text{DMSO-d}_6$ ,  $25^\circ\text{C}$ ),  $\delta$ : 6.95 (s, 2H; ArH), 7.59 (t,  $J = 7.6$  Hz, 1H, ArH), 7.77 (m, 2H, ArH),

7.86 (d, 2H,  $J = 7.8$  Hz, ArH), 8.02 (s, 1H, ArH), 8.07 (d, 2H,  $J = 7.7$  Hz, ArH), 8.50 (s, 1H; HC=N), 8.86 (s, br, 1H, OH), 9.18 (s, br, 2H; OH), 11.65 (s, br, 1H; NH), 12.98 (s, br, 1H; COOH). MS-ESI,  $m/z$  (%) = 415 ( $[M+Na]^+$ , 80); IR ( $cm^{-1}$ ):  $\nu_{C=O} = 1676$  (br),  $\nu_{C=N} = 1599$ . Anal. Calcd for  $C_{21}H_{16}N_2O_6 \cdot 2.5H_2O$ : C 57.67; H 4.84; N 6.40. Found: C 57.11; H 4.84; N 6.40.

**N'-(3,4,5-trihydroxybenzylidene)-semicarbazide (27)**. Yield = 62%.  $^1H$ -NMR (DMSO- $d_6$ , 25°C),  $\delta$ : 6.27 (s, br, 2H,  $NH_2$ ), 6.81 (s, 2H, ArH), 7.61 (s, 1H; HC=N), 8.57-8.96 (br, 3H; OH), 9.98 (s, br, 1H; NH). MS (EI, 70 eV)  $m/z$  (%) = 211.1 ( $[M]^+$ , 60); IR ( $cm^{-1}$ ):  $\nu_{NH} = 3460$ ;  $\nu_{OH} = 3170$ -3186;  $\nu_{C=O} = 1690$ ;  $\nu_{C=N} = 1594$ . Anal. Calcd for  $C_8H_9N_3O_4$ : C 45.50; H 4.30; N 19.90. Found: C 45.62; H 4.41; N 20.05.

**Mg(HL) $_2$ ·4H $_2$ O**. Method A. 100 mg (0.37 mmol) of **H $_2$ L** were dissolved in 30 ml of methanol and 1 eq. of  $NEt_3$  was added. The solution turned yellow and it was stirred at r.t. for 30 minutes. Upon addition of 0.5 eq. of  $Mg(CH_3COO)_2 \cdot 4H_2O$  (40 mg), a light yellow precipitate was formed, which was stirred at r.t. for 3 hours; the reaction mixture was cooled overnight and then the precipitate was filtered off and washed with water. Method B. The same as method A with 0.37 mmol of ligand and 1 equivalent of  $Mg(CH_3COO)_2 \cdot 4H_2O$ . Method C. The same as method A with 4 equivalents of base. Light yellow powder. Yield: 58%.  $^1H$ -NMR (MeOD, 25°C),  $\delta$ : 3.89 (s, 3H,  $OCH_3$ ); 6.89 (t,  $J = 7.8$  Hz, 1H, ArH); 6.99-7.04 (m, 3H, ArH); 7.13 (d,  $J = 7.6$  Hz, 1H); 8.51 (s, 1H; HC=N).  $^{13}C$ -NMR (MeOD- $d_4$ , 25°C),  $\delta$ : 55.26; 106.89; 113.60; 118.69; 118.96; 121.35; 122.70; 137.56; 145.46; 147.44; 148.07; 148.65; 165.26.  $^1H$ -NMR (DMSO- $d_6$ , 25°C),  $\delta$ : 3.89 (s,  $OCH_3$ ); 3.85 (s,  $OCH_3$ , decoordinates ligand); 6.85-6.87 (overlapping signals); 6.96-7.07 (overlapping signals); 7.13-7.15 (overlapping signals); 8.51 (s, HC=N), 8.60 (s, HC=N, decoordinates ligand). MS-ESI,  $m/z$  (%) = 659 ( $[M+H]^+$ , 60); IR ( $cm^{-1}$ ):  $\nu_{NH+OH} = 3476, 3322$  (br);  $\nu_{C=O} = 1643$ . Anal. Calcd for  $C_{30}H_{26}N_4O_{12}Mg \cdot 4H_2O$ : C 49.30; H 4.69; N 7.67. Found: C 49.54; H 4.87; N 7.59.



**Figure S1.** UV-visible titration of ligand **23** (A) and **19** (B) with increasing amount of  $\text{Mg}(\text{CH}_3\text{COO})_2$

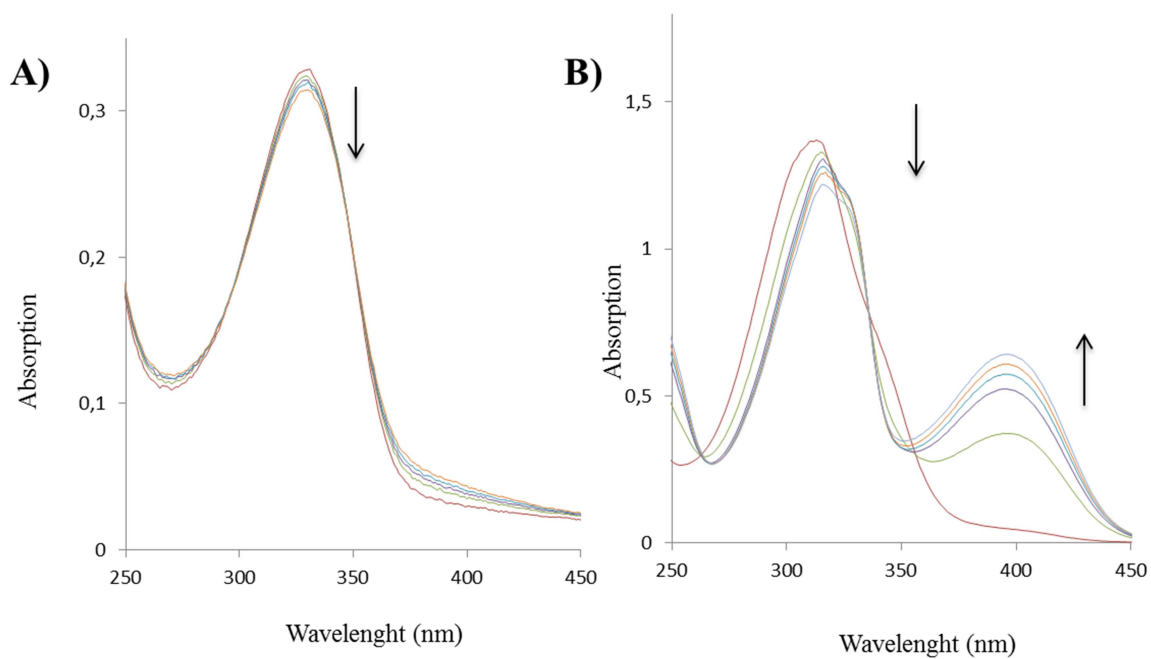

**Figure S2.** Dose-response curves for the biological activity of compounds **10**, **13** and **23**. Left panels: enzymatic assay with PA-Nter; right panels: cell-based vRNP reconstitution assay. The graphs were made by non-linear regression analysis on data from 2 to 4 experiments using GraphPad Prism

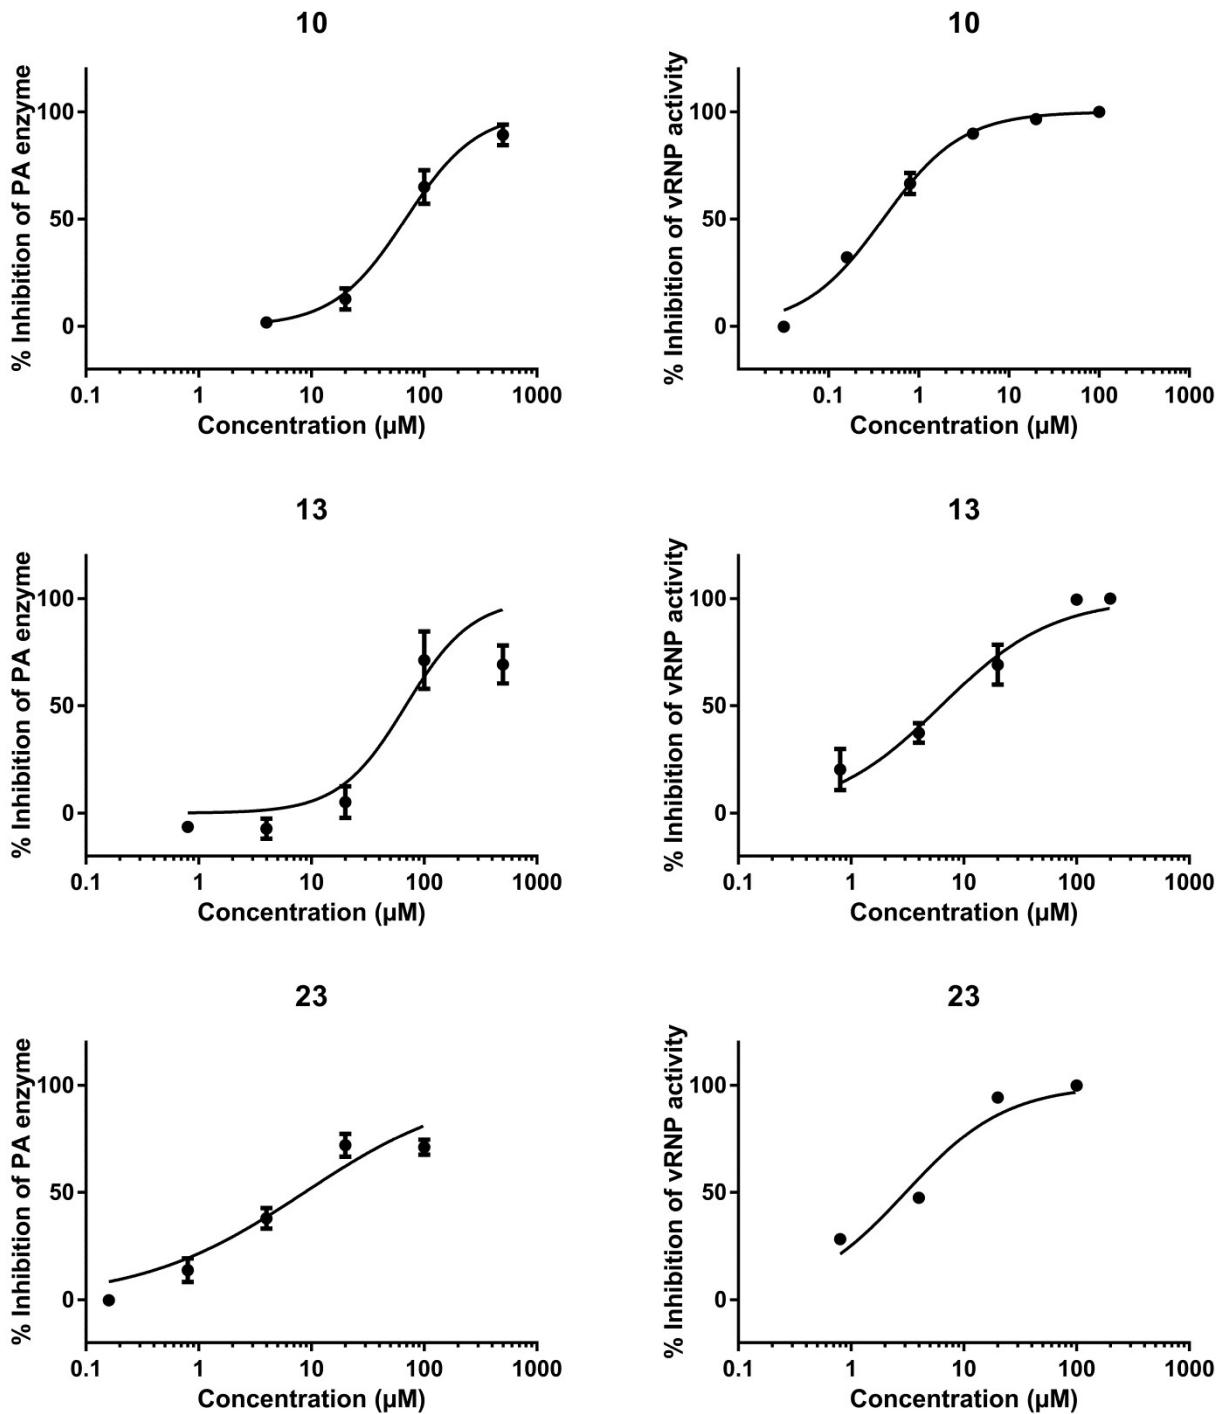

**Table S1:** Crystallographic data collection and refinement statistics for the PA<sub>N</sub><sup>ΔLoop</sup>-Compound **23** complex.

| <b>PDB code</b>                                     | <b>5EGA</b>           |
|-----------------------------------------------------|-----------------------|
| <b>Data collection</b>                              |                       |
| Space group                                         | P6 <sub>4</sub> 22    |
| <i>a</i> , <i>b</i> , <i>c</i> (Å)                  | 73.99, 73.99, 128.55  |
| $\alpha$ , $\beta$ , $\gamma$ (°)                   | 90.0, 90.0, 120.0     |
| Resolution (Å)*                                     | 50.0-2.15 (2.23-2.15) |
| <i>R</i> <sub>meas</sub> *                          | 7.3 (96.2)            |
| <i>I</i> / $\sigma$ <i>I</i> *                      | 42.8 (3.0)            |
| Completeness (%)                                    | 99.4                  |
| Redundancy                                          | 16.7                  |
| Wilson B-factor (Å <sup>2</sup> )                   | 54.5                  |
| <b>Refinement</b>                                   |                       |
| Resolution*                                         | 50.0-2.15 (2.21-2.15) |
| No. of reflections                                  | 11252                 |
| <i>R</i> <sub>work</sub> / <i>R</i> <sub>free</sub> | 20.7/23.4             |
| No. of atoms                                        |                       |
| Protein                                             | 1405                  |
| Mn                                                  | 2                     |
| Ligand                                              | 23                    |
| Water                                               | 32                    |
| B-factor (Å <sup>2</sup> )                          |                       |
| Protein                                             | 64.11                 |
| Metal                                               | 57.25                 |
| Ligand                                              | 89.26                 |
| Water                                               | 56.31                 |
| r.m.s. deviations                                   |                       |
| Bond lengths (Å)                                    | 0.012                 |
| Bond angles (Å)                                     | 1.415                 |
| Ramachandran Plot                                   |                       |
| % residues in favoured region                       | 98.3                  |
| % residues in allowed region                        | 1.7                   |
| % residues in outlier region                        | 0                     |

\*Highest resolution shell is shown in parenthesis.
